# Supplementary material for: A New Measure of Population Health in a Complex Sampling Survey: The 2019 Georgia Behavioral Risk Factor Surveillance Survey – Unweighted, Weighted, and Imputed Weighted Data
Source: Research Square preprint supplement (doi:10.21203/rs.3.rs-793157/v1), 2021-09-02
Supplement: Supplementary file 2 [file c32b7571e3df39f78458024d.docx]

**Appendix Table A: Confidence intervals calculated using two methods.**

|  | **Clopper-Pearson**  **Confidence Interval** | | | | **Korn-Graubard**  **Confidence Interval** | | |
| --- | --- | --- | --- | --- | --- | --- | --- |
| **Percent Missing & Examples** | **Percent** | | **CIL** | **CIU** | **Percent** | **CIL** | **CIU** |
| No Missing: Gender |  | |  |  |  |  |  |
| Male | 44.98 | | 41.59 | 48.42 | 44.98 | 41.59 | 48.41 |
| Female | 46.10 | | 43.15 | 49.07 | 46.10 | 43.15 | 49.07 |
| < 3%: Race |  | |  |  |  |  |  |
| Black, Non-Hispanic | 57.59 | | 52.79 | 62.28 | 57.59 | 52.79 | 62.28 |
| White, Non-Hispanic | 42.57 | | 40.02 | 45.16 | 42.57 | 40.02 | 45.16 |
| Other | 32.84 | | 26.90 | 39.22 | 32.84 | 26.91 | 39.20 |
| 11% missing: Multiple drinks on one occasion | |  |  |  |  |  |  |
| Yes | 47.50 | | 41.01 | 54.04 | 47.50 | 41.03 | 54.03 |
| No | 45.42 | | 43.00 | 47.86 | 45.42 | 43.00 | 47.86 |
| Greater than 25%: SOGI |  | |  |  |  |  |  |
| SOGI Cis gender | 46.45 | | 44.11 | 48.80 | 46.45 | 44.11 | 48.80 |
| SOGI All other | 41.88 | | 32.98 | 51.19 | 41.88 | 33.01 | 51.15 |

**Note**: New item ‘Have you experienced the death of a family member or close friend in the years 2018 or 2019? SOGI§, CIS Gender includes ‘I think of myself as straight and not transgender.’ SOGI§, all other includes Gay /Bisexual /Something else and transgender (male to female, female to male, gender nonconforming). CIL = 95% Confidence interval, lower limit; CIU = 95% Confidence interval, upper limit. See Table 1 for rates of missing responses. Scenario for this table uses complex sample weights without regard to missing items to calculate CI.
