# Supplementary material for: A New Measure of Population Health in a Complex Sampling Survey: The 2019 Georgia Behavioral Risk Factor Surveillance Survey – Unweighted, Weighted, and Imputed Weighted Data
Source: Research Square preprint supplement (doi:10.21203/rs.3.rs-793157/v1), 2021-09-02
Supplement: Supplementary file 3 [file b6a753dd17007be75acf8594.docx]

**Appendix Table B**: Data scenarios, multivariate models, and odds of detrimental health behaviors associated with bereavement. 2019 Georgia BRFSS.

|  | **Scenario 1** | | | | | | **Scenario 2** | | | | | |
| --- | --- | --- | --- | --- | --- | --- | --- | --- | --- | --- | --- | --- |
|  | **Gender** | | | **SOGI§** | | | **Gender** | | | **SOGI§** | | |
|  | ORadj | CIL | CIU | ORadj | CIL | CIU | ORadj | CIL | CIU | ORadj | CIL | CIL |
| **Health Behavior, During the Past 30 days** | | | |  |  |  |  |  |  |  |  |  |
| Binge Drinking | 1.21 | 1.01 | 1.46 | 1.19 | 0.99 | 1.42 | 1.16 | 0.86 | 1.55 | 1.14 | 0.86 | 1.52 |
| Current smoker | 1.34 | 1.13 | 1.60 | 1.31 | 1.10 | 1.56 | 1.43 | 1.10 | 1.86 | 1.42 | 1.09 | 1.85 |
| Self-Rated Health, Fair or Poor | 1.15 | 1.01 | 1.32 | 1.18 | 1.03 | 1.35 | 1.25 | 1.01 | 1.55 | 1.26 | 1.02 | 1.55 |
| Physical Health, Not Good, 14 or more days | 1.23 | 1.05 | 1.43 | 1.25 | 1.07 | 1.47 | 1.35 | 1.06 | 1.71 | 1.35 | 1.07 | 1.72 |
| Mental Health, Not Good, 14 or more days | 1.43 | 1.21 | 1.68 | 1.44 | 1.22 | 1.70 | 1.59 | 1.25 | 2.02 | 1.60 | 1.26 | 2.03 |

**Note: ORadj** = Odds ratio adjusted for Age and Race. **CIL** = 95% Confidence interval, lower limit; **CIU** = 95% Confidence interval, upper limit. **Gender** = Male, Female. **SOGI§**, CIS Gender includes ‘I think of myself as straight and not transgender.’ SOGI**§**, all other includes Gay / Bisexual /Something else and transgender (male to female, female to male, gender nonconforming). **Scenario 1:** n = 5, 206 interviewed. Estimate without accounting for complex design or missing responses. **Scenario 2:** Apply complex sample weights and account for missing responses.
